# Supplementary material for: Sequencing and Analysis of the Sex Determination Region of Populus trichocarpa
Source: Genes (Basel). 2020 Jul 24;11(8):843. doi: 10.3390/genes11080843 (PMC7465354; doi:10.3390/genes11080843)
Supplement: Supplementary file 1 [file genes-11-00843-s001.xlsx]

## Sheet: Sheet1
Supplementary Table S1 List of RNAseq files and corresponding NCBI SRA accession numbers.
FILENAME	LIBNAME	CLONEID	STAGE	SRA accession
8649.4.107903.ATTCCT.anqrpt.fastq.gz	ACBGB	BESC423	ZL_7_female_early	SRR6031371
8649.6.107921.TCATTC.anqrpt.fastq.gz	ACBGN	BESC423	ZL_7_female_early	SRR6031364
8649.8.107939.ACTCTC.anqrpt.fastq.gz	ACBGU	BESC423	ZL_7_female_early	SRR6031385
8649.3.107894.AGTCAA.anqrpt.fastq.gz	ACBCZ	BESC443	ZG_43_female_receptive	SRR6031372
8650.4.107832.CCCATG.anqrpt.fastq.gz	ACBGW	BESC443	ZG_43_female_receptive	SRR6031378
8649.5.107912.CACGAT.anqrpt.fastq.gz	ACBGG	BESC842	ZI_22_female_late	SRR6031369
8649.6.107921.GACGAC.anqrpt.fastq.gz	ACBGH	BESC842	ZI_22_female_late	SRR6031373
8649.8.107939.ACATCT.anqrpt.fastq.gz	ACBGS	BESC842	ZI_22_female_late	SRR6031377
8630.7.107459.GGCTAC.anqrpt.fastq.gz	ACBCX	GW9592	ZK_10_male_early	SRR6031379
8650.5.107841.CTGCTG.anqrpt.fastq.gz	ACBGY	GW9592	ZK_10_male_early	SRR6031384
8650.6.107850.TTCTCC.anqrpt.fastq.gz	ACBHB	GW9592	ZK_10_male_early	SRR6031392
8649.5.107912.CAACTA.anqrpt.fastq.gz	ACBGC	GW9840	ZE_30_male_early	SRR6031370
8649.7.107930.TCGAAG.anqrpt.fastq.gz	ACBGO	GW9840	ZE_30_male_early	SRR6031367
8649.8.107939.AATAGG.anqrpt.fastq.gz	ACBGP	GW9840	ZE_30_male_early	SRR6031382
8649.3.107894.ATGTCA.anqrpt.fastq.gz	ACBGA	GW9911	ZK_51_male_mid	SRR6031365
8650.5.107841.CCTTAG.anqrpt.fastq.gz	ACBGX	GW9911	ZK_51_male_mid	SRR6031394
8650.6.107850.TGGCGC.anqrpt.fastq.gz	ACBHA	GW9911	ZK_51_male_mid	SRR6031393
